# Supplementary material for: Feasibility of 18F-Fluorocholine PET for Evaluating Skeletal Muscle Atrophy in a Starved Rat Model
Source: MDPI journal article supplement (doi:10.3390/diagnostics12051274), 2022-05-20
Supplement: s1 [file s1]

# Supplementary Materials

## Feasibility of $^{18}\text{F}$ -Fluorocholine PET for Evaluating Skeletal Muscle Atrophy in a Starved Rat Model

Sun Mi Park<sup>1,†</sup>, Jisu Kim<sup>2,†</sup>, Suji Baek<sup>3,†</sup>, Joo-Yeong Jeon<sup>4</sup>, Sang Ju Lee<sup>5</sup>, Seo Young Kang<sup>1</sup>, Min Young Yoo<sup>6</sup>, Hai-Jeon Yoon<sup>6</sup>, Seung Hae Kwon<sup>4</sup>, Kiwon Lim<sup>2</sup>, Seung Jun Oh<sup>5</sup>, Bom Sahn Kim<sup>1,\*</sup>, Kang Pa Lee<sup>1,3,\*</sup>, and Byung Seok Moon<sup>1,\*</sup>

<sup>1</sup>Department of Nuclear Medicine, College of Medicine, Ewha Womans University Seoul Hospital, Ewha Womans University, Seoul 07804, Korea; psm9728@ewhain.net (S.M.P.); eironn02@gmail.com (S.Y.K.)

<sup>2</sup>Physical Activity and Performance Institute, Konkuk University, Seoul 05029, Korea; kimpro@konkuk.ac.kr (J.K.); exercise@konkuk.ac.kr (K.L.)

<sup>3</sup>Research and Development Center, UMUST R&D Corporation, Seoul 01411, Korea; u-service@naver.com

<sup>4</sup>Seoul Center, Korean Basic Science Institute, Seoul 02841, Korea; jjy0183@kbsi.re.kr (J-Y.J.); kwonsh@kbsi.re.kr (S.H.K.)

<sup>5</sup>Department of Nuclear Medicine, College of Medicine, Asan Medical Center, University of Ulsan, Seoul 05505, Korea; atlas425@amc.seoul.kr (S.J.L.); sjoh@amc.seoul.kr (S.J.O.)

<sup>6</sup>Department of Nuclear Medicine, College of Medicine, Ewha Womans University Mokdong Hospital, Ewha Womans University, Seoul 07985, Korea; ckitten@naver.com (M.Y.Y.); haijeon.yoon@gmail.com (H.-J.Y.)

\* Correspondence: bsmoon@ewha.ac.kr (B.S.M.); umustrnd@naver.com (K.P.L.); kbomsahn@ewha.ac.kr (B.S.K.).

<sup>†</sup>These authors contributed equally to this work.

**Figure S1.** The results of mRNA expression levels of MuRF-1 and atrogin-1 using reverse-transcription polymerase chain reaction (n = 3).

**Table S1.** The results of body weight and muscle weight in each group

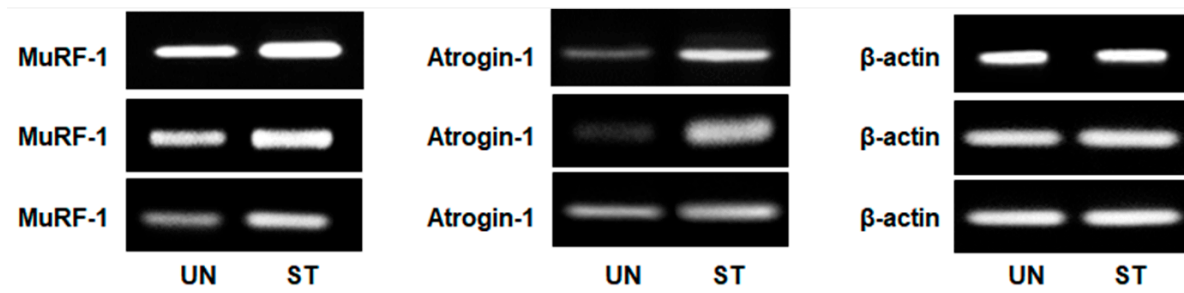

**Figure S1.** The results of mRNA expression levels of MuRF-1 and atrogin-1 using reverse-transcription polymerase chain reaction (n = 3).

**Table S1.** The results of body weight and muscle weight in each group

| Group | Body weight<br>before<br>experiment (g) | Body weight<br>after<br>treatment (g) | Soleus (mg)   | Plantaris<br>(mg) | Gastrocnemius<br>(g) | Total muscle<br>weight (g) |
|-------|-----------------------------------------|---------------------------------------|---------------|-------------------|----------------------|----------------------------|
| UN    | 283.3 ± 2.68                            | 298.0 ± 4.66                          | 200.0 ± 5.74  | 369.5 ± 6.68      | 1.74 ± 0.60          | 2.31 ± 0.16                |
| ST    | 283.3 ± 2.62                            | 234.9 ± 5.64                          | 159.55 ± 7.55 | 335.8 ± 8.47      | 1.68 ± 0.95          | 2.18 ± 0.23                |

UN: untreated group (n = 6); ST: starvation group (n = 7)
